# Supplementary material for: Multi-Color Quantum Dot Tracking Using a High-Speed Hyperspectral Line-Scanning Microscope
Source: PLoS One. 2013 May 22;8(5):e64320. doi: 10.1371/journal.pone.0064320 (PMC3661486; doi:10.1371/journal.pone.0064320)
Supplement: Text S3 — Theoretical point spread function of HSM. (DOCX) [file pone.0064320.s024.docx]

## Text S3. Theoretical Point Spread Function of HSM

In the HSM, the excitation path is the same as a line scanning confocal microscope. On the sample plane, assuming that a single fluorophore is at point (0,0,*z*), the excitation laser line is along the *y*-axis at position . The excitation field at the fluorophore is

.

We use for magnitude point spread function, and for intensity point spread function. is a line spread function, assuming the intensity along *y*-axis is uniform. In the emission path, after light passes through the slit, the emission field at slit will be dispersed along *x*-axis by spectrometer at the image plane. The field at image plane is generated by shifting the slit field along *x*-axis (spectral dimension) and multiplying each shifted field by the spectral function at the corresponding wavelength. We define the spectral function as , which depends on the spectrum of the sample. The field at position on image plane is

.

is the wide field emission point spread function, and is the slit shape function along x axis, which is a rectangular function with the width equal to the slit width . The above expression is the convolution of with . Combining the excitation and emission fields gives the magnitude point spread function of the HSM

.

is the wide field excitation line spread function. is a 4D point spread function, with spatial dimension , and spectral dimension . The intensity point spread function is

.
