# Supplementary material for: Multi-Color Quantum Dot Tracking Using a High-Speed Hyperspectral Line-Scanning Microscope
Source: PLoS One. 2013 May 22;8(5):e64320. doi: 10.1371/journal.pone.0064320 (PMC3661486; doi:10.1371/journal.pone.0064320)
Supplement: Text S6 — Building trajectories from localizations. (DOCX) [file pone.0064320.s027.docx]

**Text S6. Building Trajectories from Localizations.**

Cost matrices are used to build trajectories in two steps: frame-to-frame and gap closing. Physical models are used to derive the costs for linking localizations, starting a new trajectory (birth), and ending a trajectory (death). The cost for connecting observations 1 and 2 is

.

Under the assumption of Brownian motion, the probability of making observation 2 () given observation 1 () is

,

where

is the spatial localization error for observation 1 and is similarly defined for observation 2. Similarly, due to the spectral emission peak, the probability of making observation 2 ( given observation 1 ( is

,

where accounts for the variance in the observed spectral emission peak due to spectral jumping or bluing of individual QDs. The cost for a previously unobserved QD blinking on (birth) or a currently tracked QD blinking off (death) is determined by particle density and estimated blinking rates. Building a cost matrix from physical models is discussed in more detail in a manuscript in preparation by Relich P, Cutler PJ, Huang F, Lidke KA.

The cost matrix built from costs of linking, birth, and death is treated as a linear assignment problem to link localizations into trajectories. The spectral information of localized QDs greatly improves the accuracy of trajectories and permits SPT at higher labeling densities (**Figure S14**).
